# Supplementary material for: In situ construction of an ultra-thin and flexible polymer electrolyte for stable all-solid-state lithium-metal batteries
Source: Royal Society of Chemistry journal article supplement (doi:10.1039/d3ta07586a), 2024-01-01
Supplement: d3ta07586a1.pdf [file d3ta07586a1.pdf]

## **In-Situ Constructing of Ultra-Thin and Flexible Polymer Electrolyte for Stable All-Solid-State Lithium-Metal Batteries**

Shilun Gao,<sup>a, b, ‡</sup> Mengxiang Ma,<sup>a, ‡</sup> Youjia Zhang,<sup>a</sup> Lin Li,<sup>c</sup> Shuangshuang Zhu,<sup>a</sup> Yayue He,<sup>a</sup> Dandan Yang,<sup>d</sup> Huabin Yang,<sup>\*a, e</sup> and Peng-Fei Cao<sup>\*c</sup>

<sup>a</sup>*Institute of New Energy Material Chemistry, School of Materials Science and Engineering, Nankai University, Tianjin 300350, China.*

<sup>b</sup>*School of Integrated Circuit Science and Engineering, Tianjin University of Technology, No. 391, Binshui Xidao, Xiqing District, Tianjin, PR China.*

<sup>c</sup>*State Key Laboratory of Organic-Inorganic Composites, Beijing University of Chemical Technology, Beijing 100029, China.*

<sup>d</sup>*Experimental Teaching Center of Materials Science, School of Materials Science and Engineering, Nankai University, Tianjin 300350, China.*

<sup>e</sup>*Tianjin Key Laboratory of Metal and Molecular Based Material Chemistry, School of Materials Science and Engineering, Nankai University, Tianjin, 300350, China*

*‡These authors contributed equally to this work.*

*Corresponding authors:*

*Huabin Yang: [hb\\_yang@nankai.edu.cn](mailto:hb_yang@nankai.edu.cn)*

*Peng-Fei Cao: [caopf@buct.edu.cn](mailto:caopf@buct.edu.cn)*

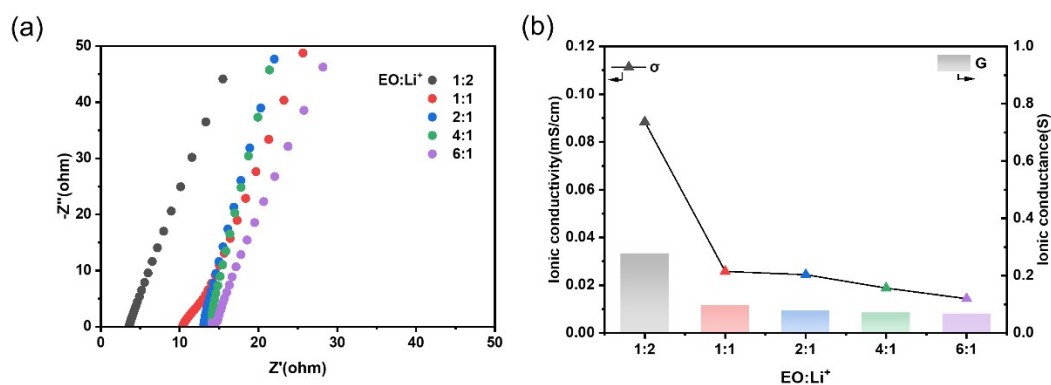

**Figure S1.** (a) The EIS curves and (b) corresponding ionic conductivity and conductance of the polymer electrolyte with different molar ratio of EO:Li<sup>+</sup>.

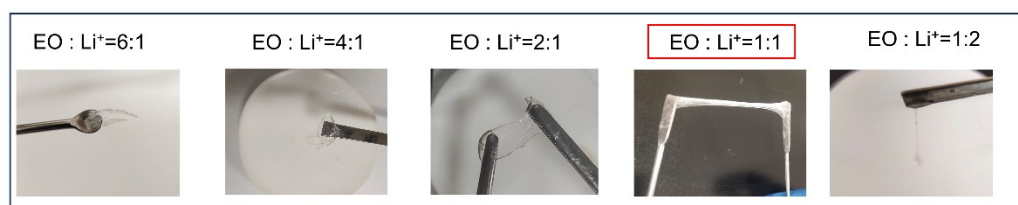

**Figure S2.** The digital photos of the polymer electrolyte with different molar ratios of EO:Li<sup>+</sup>.

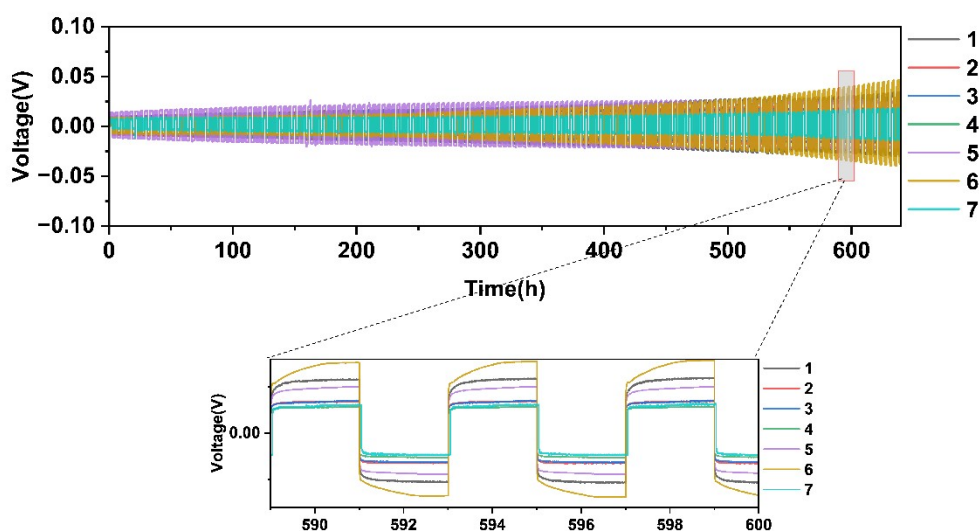

**Figure S3.** Voltage profiles of the Li||Li cells at current density of  $0.1 \text{ mA cm}^{-2}$  with electrolytes prepared by different ratio of monomers (for example: electrolyte 1 was prepared by PEGMEMA:VEC:DMAPMA=0.5:1:1, see Table S2 for more details)

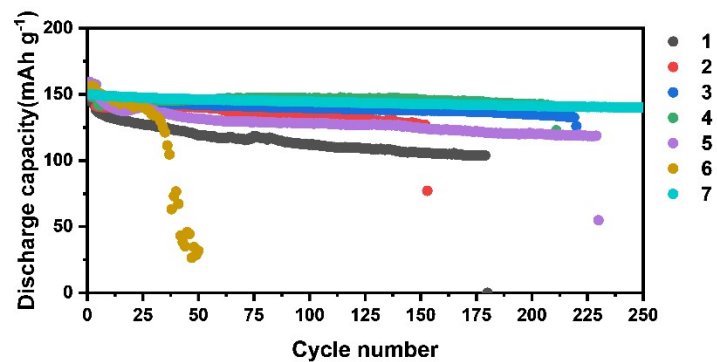

**Figure S4.** Cycling performance of the Li||LiFePO<sub>4</sub> cells at current density of 0.5 C with different ratios of monomers

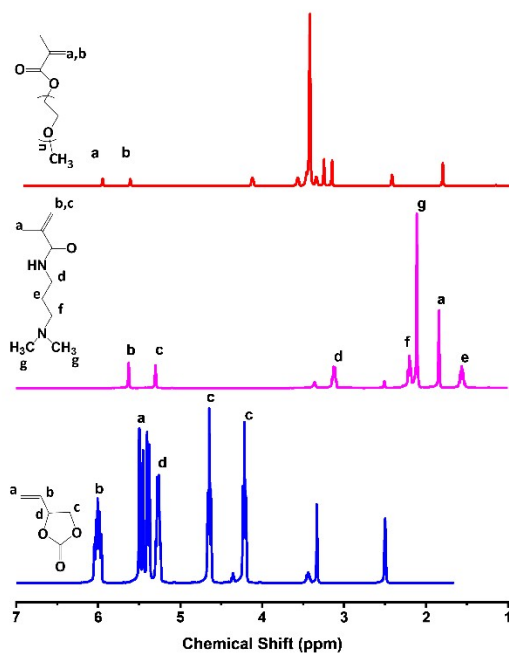

**Figure S5.** <sup>1</sup>H NMR spectra of PEGMEMA, DMAPMA and VEC.

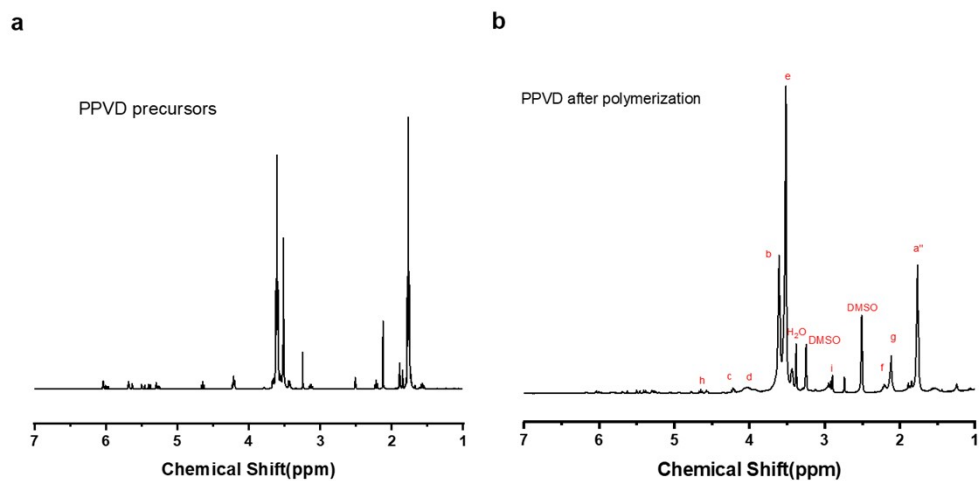

**Figure S6.**  $^1\text{H}$  NMR spectrum of (a) PPVD precursor and (b) polymerized PPVD.

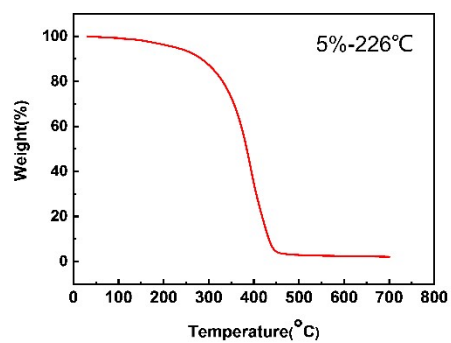

**Figure S7.** The thermogravimetric analysis of PPVD.

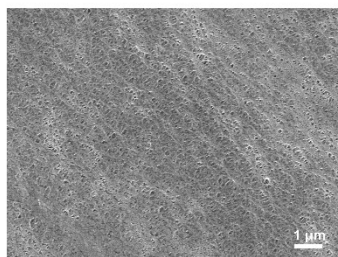

**Figure S8.** SEM image of 4  $\mu\text{m}$  ultra-thin film.

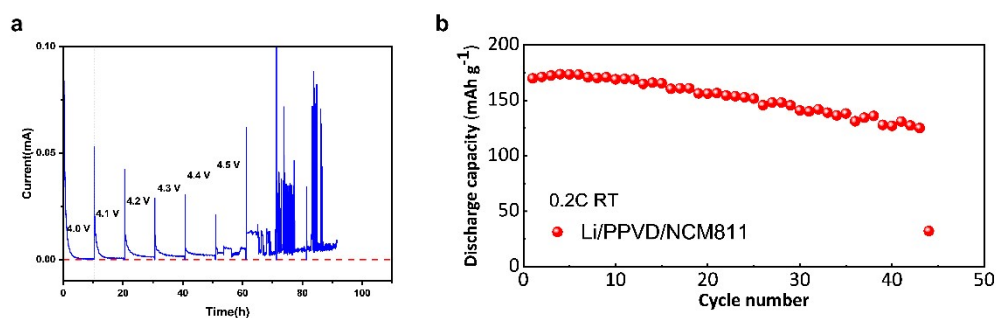

**Figure S9.** (a) Electrochemical floating analysis of the PPVD; (b) Cycling performance of the Li/PPVD/NCM full cell at 0.2 C

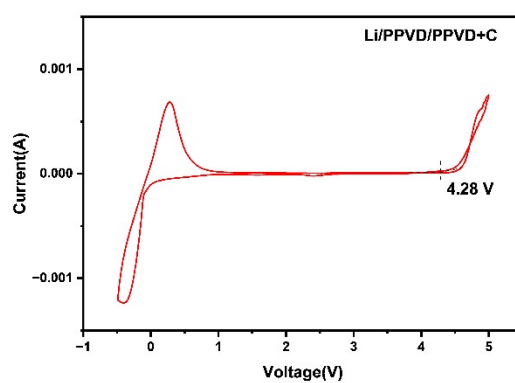

**Figure S10.** CV curve of Li/PPVD/PPVD-C cell within the voltage range of 2.5–5.0 V.

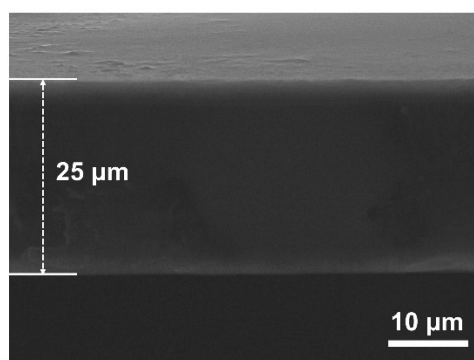

**Figure S11.** Cross-sectional SEM image of PPVD@PPF electrolyte.

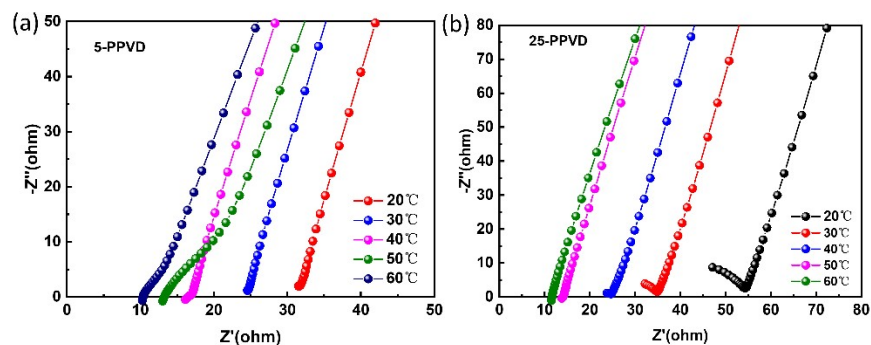

**Figure S12.** The EIS curves of symmetric cells with (a) PPVD@PEF and (b) PPVD@PPF as electrolyte.

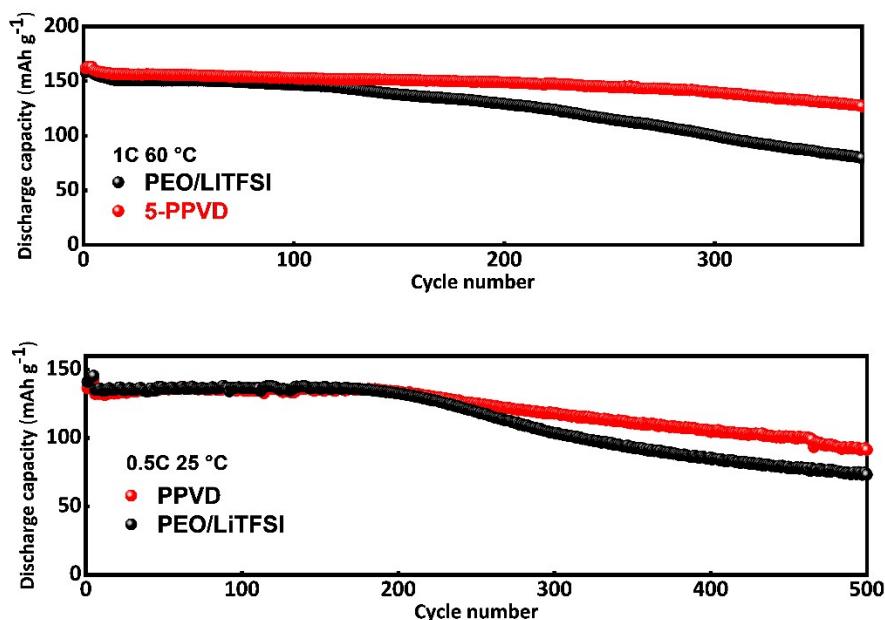

**Figure S13.** Cycling performance of Li|PPVD@PEF|LFP and Li|PEO@PEF|LFP cells at the current density of (a) 1 C and (b) 0.5 C.

**Table S1.** Corresponding ionic conductivity and conductance of polymer electrolytes with different molar ratio of EO:Li<sup>+</sup>

| Molar ratio               | 6:1    | 4:1    | 2:1    | 1:1    | 1:2   |
|---------------------------|--------|--------|--------|--------|-------|
| Ionic conductivity(mS/cm) | 0.0143 | 0.0188 | 0.0244 | 0.0206 | 0.103 |
| Ionic conductance(S)      | 0.0676 | 0.0709 | 0.0766 | 0.0973 | 0.278 |

**Table S2.** The electrolytes with different molar ratios of PEGMEMA:VEC:DMAPMA

| Electrolyte | PEGMEMA:VEC:DMAPMA |
|-------------|--------------------|
| 1           | 0.5:1:1            |
| 2           | 2:1:1              |
| 3           | 1:0.5:1            |
| 4           | 1:2:1              |
| 5           | 1:1:0.5            |
| 6           | 1:1:2              |
| 7           | 1:1:1              |

**Table S3.** Electrochemical performance of Li||LiFePO<sub>4</sub> cells at current density of 0.5 C with different ratio of monomers

| Electrolyte | Initial capacity (mAh g <sup>-1</sup> ) | Capacity retention @ cycles |
|-------------|-----------------------------------------|-----------------------------|
| 1           | 146.3                                   | 75.3% @179 cycles           |
| 2           | 148.4                                   | 90.1% @152 cycles           |
| 3           | 149.5                                   | 91 % @219 cycles            |
| 4           | 151.2                                   | 93.2 % @210 cycles          |
| 5           | 159.5                                   | 79% @229 cycles             |
| 6           | 155.8                                   | 20.8% @50 cycles            |

**Table S4. Ionic conductivity( $\sigma$ ) and Ionic conductance(G) for PPVD@PEF and PPVD@PPF**

|              | Thickness(cm)      | R( $\Omega$ ) | Area(cm <sup>-2</sup> ) | $\sigma$ (mS cm <sup>-1</sup> ) | G (mS)  |
|--------------|--------------------|---------------|-------------------------|---------------------------------|---------|
| PPVD@<br>PEF | 0.0004             | 10.28         | 1.886                   | 0.0206                          | 97.276  |
|              | 0.0007             | 9.63          | 1.886                   | 0.0386                          | 103.87  |
|              | 0.0008             | 8.55          | 1.886                   | 0.0496                          | 116.95  |
|              | 0.0005             | 10.08         | 1.886                   | 0.0263                          | 99.26   |
|              | 0.0005             | 8.46          | 1.886                   | 0.0313                          | 118.15  |
|              | Average            |               |                         | 0.03329                         | 107.099 |
|              | Standard deviation |               |                         | 0.01125                         | 9.84    |
| PPVD@<br>PPF | 0.0025             | 14.54         | 1.886                   | 0.0912                          | 68.78   |
|              | 0.0033             | 11.46         | 1.886                   | 0.1526                          | 87.24   |
|              | 0.0035             | 25.14         | 1.886                   | 0.0738                          | 39.78   |



|                           |        |       |       |         |        |
|---------------------------|--------|-------|-------|---------|--------|
|                           | 0.0035 | 18.01 | 1.886 | 0.1030  | 55.52  |
|                           | 0.0033 | 15.98 | 1.886 | 0.1095  | 62.58  |
| Average                   |        |       |       | 0.10603 | 62.777 |
| Standard<br>deviatio<br>n |        |       |       | 0.02938 | 17.43  |
